# Supplementary material for: Exploring the binding properties and structural stability of an opsin in the chytrid Spizellomyces punctatus using comparative and molecular modeling
Source: PeerJ. 2017 Apr 27;5:e3206. doi: 10.7717/peerj.3206 (PMC5410147; doi:10.7717/peerj.3206)
Supplement: Table S2 — The columns of this table: Rank, PDB ID, Protein sequence identity, Query protein coverage, Z-score, and sequence chain molecule description [file peerj-05-3206-s005.xlsx]

## Sheet: I-Tasser Templates
Rank	PDB ID	Ident	Cov	Z-score	Description
1	2Z73B	0.16	0.9	17.241	Crystal structure of squid rhodopsin
2	2YDVA	0.18	0.82	10.526	Thermostabilised human A2A receptor with NECA bound
3	2Y03A	0.18	0.77	31.25	Turkey beta1 adrenergic receptor with stabilising mutations and bound agonist isoprenaline
4	2Z73B	0.17	0.9	10.753	Crystal structure of squid rhodopsin
5	2ZIYA	0.17	0.9	8.696	Crystal structure of squid rhodopsin
6	2Z73A	0.16	0.9	17.241	Crystal structure of squid rhodopsin
7	2Z73B	0.17	0.9	10.526	Crystal structure of squid rhodopsin
8	2Y00B	0.18	0.8	31.25	Turkey beta1 adrenergic receptor with stabilising mutations and bound partial agonist dobutamine (Crystal DOB92)
9	2Z73A	0.17	0.9	10.753	Crystal structure of squid rhodopsin
10	2Z73A	0.17	0.9	8.696	Crystal structure of squid rhodopsin
